# Supplementary material for: Effect of Red Ginseng on Genotoxicity and Health-Related Quality of Life after Adjuvant Chemotherapy in Patients with Epithelial Ovarian Cancer: A Randomized, Double Blind, Placebo-Controlled Trial
Source: MDPI journal article supplement (doi:10.3390/nu9070772), 2017-07-19
Supplement: s1 [file s1]

Supplementary Table S1. Evaluation of health-related quality of life by using the European Organization for Research and Treatment of Cancer Quality of Life (EORTC QLQ)-C30

| Outcomes               | Placebo (n=15) |             | <i>p</i> value | Red ginseng (n=15) |             | <i>p</i> value |
|------------------------|----------------|-------------|----------------|--------------------|-------------|----------------|
|                        | Week 0         | Week 12     |                | Week 0             | Week 12     |                |
| Functional scale       |                |             |                |                    |             |                |
| Physical               | 49.4 ± 12.4    | 40.9 ± 10.4 | 0.022          | 54.1 ± 10.6        | 47.1 ± 15.7 | 0.018          |
| Role                   | 48.4 ± 18.2    | 38.3 ± 14.0 | 0.165          | 57.4 ± 19.8        | 48.5 ± 21.1 | 0.120          |
| Emotional              | 37.5 ± 10.9    | 38.7 ± 13.9 | 0.702          | 44.9 ± 15.3        | 37.5 ± 12.7 | 0.027          |
| Cognitive              | 40.6 ± 12.5    | 44.5 ± 12.9 | 0.218          | 41.2 ± 12.3        | 38.2 ± 12.1 | 0.206          |
| Social                 | 55.5 ± 21.9    | 42.2 ± 18.2 | 0.019          | 61.0 ± 20.7        | 45.6 ± 23.8 | 0.012          |
| Global quality of life | 63.8 ± 15.5    | 70.5 ± 19.1 | 0.178          | 66.0 ± 15.5        | 76.1 ± 18.7 | 0.081          |
| Symptom scale          |                |             |                |                    |             |                |
| Fatigue                | 53.7 ± 11.8    | 45.8 ± 13.9 | 0.131          | 58.8 ± 19.2        | 46.1 ± 16.2 | 0.012          |
| Nausea and vomiting    | 30.5 ± 6.4     | 27.3 ± 5.0  | 0.157          | 37.5 ± 15.3        | 27.2 ± 6.6  | 0.004          |
| Pain                   | 43.0 ± 14.4    | 36.7 ± 11.6 | 0.204          | 50.0 ± 19.8        | 43.4 ± 17.2 | 0.179          |
| Dyspnea                | 40.6 ± 22.1    | 31.3 ± 14.4 | 0.161          | 47.1 ± 17.4        | 35.3 ± 17.8 | 0.021          |
| Sleep disturbance      | 43.8 ± 19.4    | 40.6 ± 23.9 | 0.527          | 41.2 ± 21.5        | 41.2 ± 17.5 | 1.000          |
| Appetite loss          | 37.5 ± 12.9    | 29.7 ± 10.1 | 0.025          | 48.5 ± 20.7        | 33.8 ± 17.5 | 0.031          |
| Constipation           | 42.2 ± 19.8    | 40.6 ± 22.1 | 0.739          | 33.8 ± 17.5        | 38.2 ± 23.6 | 0.180          |
| Diarrhea               | 29.7 ± 10.1    | 29.7 ± 10.1 | 1.000          | 29.4 ± 13.2        | 27.9 ± 8.3  | 0.564          |
| Financial problem      | 45.3 ± 22.7    | 42.2 ± 19.8 | 0.564          | 50.0 ± 17.7        | 42.7 ± 19.3 | 0.132          |

All values were shown by mean with standard deviation.

| Outcomes          | Placebo (n=15) |               | <i>p</i> value | Red ginseng (n=15) |               | <i>p</i> value |
|-------------------|----------------|---------------|----------------|--------------------|---------------|----------------|
|                   | Week 0         | Week 12       |                | Week 0             | Week 12       |                |
| Severity          |                |               |                |                    |               |                |
| Fatigue right now | 3.19 ± 1.80    | 2.44 ± 1.67   | 0.137          | 3.71 ± 2.44        | 2.82 ± 2.48   | 0.128          |
| Usual fatigue     | 3.63 ± 1.71    | 2.31 ± 1.58   | 0.022          | 4.24 ± 2.80        | 2.88 ± 2.47   | 0.038          |
| Worst fatigue     | 4.25 ± 2.27    | 3.62 ± 2.71   | 0.658          | 5.59 ± 3.20        | 4.00 ± 3.32   | 0.026          |
| Interference      | 19.25 ± 10.33  | 11.38 ± 11.84 | 0.084          | 23.24 ± 17.79      | 14.29 ± 17.59 | 0.014          |

### BFI scoring system

1. Please rate your fatigue (weariness, tiredness) by circling the one number that best describes your fatigue right now

2. Please rate your fatigue (weariness, tiredness) by circling the one number that best describes your usual level of fatigue during past 24 hours

3. Please rate your fatigue (weariness, tiredness) by circling the one number that best describes your worst level of fatigue during past 24 hours

## II. Interference

## 1. General activity

|                  |   |   |   |   |   |   |   |   |                      |    |
|------------------|---|---|---|---|---|---|---|---|----------------------|----|
| 0                | 1 | 2 | 3 | 4 | 5 | 6 | 7 | 8 | 9                    | 10 |
| Do not interfere |   |   |   |   |   |   |   |   | Completely interfere |    |

2. Mood

|                  |   |   |   |   |   |   |   |   |                      |    |
|------------------|---|---|---|---|---|---|---|---|----------------------|----|
| 0                | 1 | 2 | 3 | 4 | 5 | 6 | 7 | 8 | 9                    | 10 |
| Do not interfere |   |   |   |   |   |   |   |   | Completely interfere |    |

3. Walking ability

|                  |   |   |   |   |   |   |   |   |                      |    |
|------------------|---|---|---|---|---|---|---|---|----------------------|----|
| 0                | 1 | 2 | 3 | 4 | 5 | 6 | 7 | 8 | 9                    | 10 |
| Do not interfere |   |   |   |   |   |   |   |   | Completely interfere |    |

4. Normal work (includes both work outside the home and daily chores)

|                  |   |   |   |   |   |   |   |   |                      |    |
|------------------|---|---|---|---|---|---|---|---|----------------------|----|
| 0                | 1 | 2 | 3 | 4 | 5 | 6 | 7 | 8 | 9                    | 10 |
| Do not interfere |   |   |   |   |   |   |   |   | Completely interfere |    |

5. Relations with other people

|                  |   |   |   |   |   |   |   |   |                      |    |
|------------------|---|---|---|---|---|---|---|---|----------------------|----|
| 0                | 1 | 2 | 3 | 4 | 5 | 6 | 7 | 8 | 9                    | 10 |
| Do not interfere |   |   |   |   |   |   |   |   | Completely interfere |    |

6. Enjoyment of life

|                  |   |   |   |   |   |   |   |   |                      |    |
|------------------|---|---|---|---|---|---|---|---|----------------------|----|
| 0                | 1 | 2 | 3 | 4 | 5 | 6 | 7 | 8 | 9                    | 10 |
| Do not interfere |   |   |   |   |   |   |   |   | Completely interfere |    |

Supplementary Table S3. Evaluation of health-related quality of life by using the Brief Pain Inventory (BPI) and BPI scoring system

| Outcomes          | Placebo (n=15) |           | <i>p</i> value | Red ginseng (n=15) |           | <i>p</i> value |
|-------------------|----------------|-----------|----------------|--------------------|-----------|----------------|
|                   | Week 0         | Week 12   |                | Week 0             | Week 12   |                |
| Pain intensity    |                |           |                |                    |           |                |
| Worst             | 3.9 ± 3.2      | 3.2 ± 3.2 | 0.781          | 1.8 ± 1.7          | 1.6 ± 1.6 | 0.577          |
| Least             | 2.4 ± 2.3      | 1.4 ± 1.7 | 0.152          | 0.8 ± 1.0          | 0.9 ± 1.9 | 0.944          |
| Average           | 3.6 ± 2.8      | 2.2 ± 2.0 | 0.080          | 1.7 ± 1.4          | 1.3 ± 1.5 | 0.428          |
| Now               | 2.8 ± 2.5      | 1.5 ± 1.9 | 0.082          | 1.2 ± 1.4          | 0.9 ± 1.5 | 0.671          |
| Pain interference |                |           |                |                    |           |                |
| General activity  | 2.7 ± 2.5      | 2.1 ± 2.8 | 0.440          | 1.7 ± 1.9          | 0.8 ± 1.2 | 0.139          |
| Mood              | 2.8 ± 2.5      | 2.2 ± 2.4 | 0.301          | 1.5 ± 1.9          | 0.9 ± 1.7 | 0.397          |
| Walking           | 3.2 ± 2.7      | 2.2 ± 2.8 | 0.182          | 1.6 ± 2.1          | 0.6 ± 0.9 | 0.051          |
| Work              | 2.8 ± 3.0      | 2.6 ± 2.9 | 0.686          | 1.8 ± 2.3          | 0.7 ± 1.1 | 0.075          |
| Social relation   | 2.2 ± 2.9      | 1.6 ± 2.7 | 0.101          | 1.2 ± 1.6          | 0.5 ± 0.9 | 0.103          |
| Sleep             | 2.6 ± 2.5      | 1.4 ± 2.1 | 0.057          | 1.9 ± 2.5          | 0.5 ± 0.9 | 0.084          |
| Enjoyment of life | 3.0 ± 3.6      | 1.8 ± 3.0 | 0.138          | 1.8 ± 2.3          | 0.4 ± 0.7 | 0.035          |

All values were shown by mean with standard deviation.

### BPI scoring system

### I. Pain intensity

1. Please rate your pain by circling nsity the one number that best describes your pain at its worst in the last 24 hours

[illegible]

2. Please rate your pain by circling nsity the one number that best describes your pain at its least in the last 24 hours

[illegible]

3. Please rate your pain by circling nsity the one number that best describes your pain at the average

|         |   |   |   |   |   |   |   |                                |   |    |
|---------|---|---|---|---|---|---|---|--------------------------------|---|----|
| 0       | 1 | 2 | 3 | 4 | 5 | 6 | 7 | 8                              | 9 | 10 |
| No pain |   |   |   |   |   |   |   | Pain as bad as you can imagine |   |    |

4. Please rate your pain by circling nsity the one number that tells how much pain you have right now

|         |   |   |   |   |   |   |   |                                |   |    |
|---------|---|---|---|---|---|---|---|--------------------------------|---|----|
| 0       | 1 | 2 | 3 | 4 | 5 | 6 | 7 | 8                              | 9 | 10 |
| No pain |   |   |   |   |   |   |   | Pain as bad as you can imagine |   |    |

## II. Pain interference

: Circle the one number that describes how, during the past 24 hours, pain has interfered with your:

1. General activity

|                    |   |   |   |   |   |   |   |                       |   |    |
|--------------------|---|---|---|---|---|---|---|-----------------------|---|----|
| 0                  | 1 | 2 | 3 | 4 | 5 | 6 | 7 | 8                     | 9 | 10 |
| Does not interfere |   |   |   |   |   |   |   | Completely interferes |   |    |

2. Mood

|                    |   |   |   |   |   |   |   |                       |   |    |
|--------------------|---|---|---|---|---|---|---|-----------------------|---|----|
| 0                  | 1 | 2 | 3 | 4 | 5 | 6 | 7 | 8                     | 9 | 10 |
| Does not interfere |   |   |   |   |   |   |   | Completely interferes |   |    |

3. Walking ability

|                    |   |   |   |   |   |   |   |                       |   |    |
|--------------------|---|---|---|---|---|---|---|-----------------------|---|----|
| 0                  | 1 | 2 | 3 | 4 | 5 | 6 | 7 | 8                     | 9 | 10 |
| Does not interfere |   |   |   |   |   |   |   | Completely interferes |   |    |

4. Normal work (includes both work outside the home and housework)

|                    |   |   |   |   |   |   |   |                       |   |    |
|--------------------|---|---|---|---|---|---|---|-----------------------|---|----|
| 0                  | 1 | 2 | 3 | 4 | 5 | 6 | 7 | 8                     | 9 | 10 |
| Does not interfere |   |   |   |   |   |   |   | Completely interferes |   |    |

5. Relation with other people

|                    |   |   |   |   |   |   |   |                       |   |    |
|--------------------|---|---|---|---|---|---|---|-----------------------|---|----|
| 0                  | 1 | 2 | 3 | 4 | 5 | 6 | 7 | 8                     | 9 | 10 |
| Does not interfere |   |   |   |   |   |   |   | Completely interferes |   |    |

6. Sleep

|   |   |   |   |   |   |   |   |   |   |    |
|---|---|---|---|---|---|---|---|---|---|----|
| 0 | 1 | 2 | 3 | 4 | 5 | 6 | 7 | 8 | 9 | 10 |
|---|---|---|---|---|---|---|---|---|---|----|

Does not interfere

Completely interferes

7. Enjoyment of life

0

1

2

3

4

5

6

7

8

9

10

Does not interfere

Completely interferes

Supplementary Table S4. Evaluation of health-related quality of life by using the Hospital Anxiety and Depression Scale (HADS) and HADS scoring system

| Outcomes   | Placebo (n=15) |            | <i>p</i> value | Red ginseng (n=15) |            | <i>p</i> value |
|------------|----------------|------------|----------------|--------------------|------------|----------------|
|            | Week 0         | Week 12    |                | Week 0             | Week 12    |                |
| Anxiety    | 7.8 ± 2.4      | 8.4 ± 1.5  | 0.119          | 9.1 ± 2.6          | 8.0 ± 2.6  | 0.015          |
| Depression | 12.9 ± 2.1     | 12.4 ± 1.9 | 0.449          | 12.4 ± 2.4         | 11.6 ± 2.7 | 0.526          |

All values were shown by mean with standard deviation

#### HADS scoring system

Tick the bow beside the reply that is closest to how you have been felling in the past week.

Don't take too long over you replies: your immediate is best

| D | A |                                                                                     | D | A |                                                                              |
|---|---|-------------------------------------------------------------------------------------|---|---|------------------------------------------------------------------------------|
|   |   | <b>I feel tense or 'wound up':</b>                                                  |   |   | <b>I feel as if I am slowed down:</b>                                        |
|   | 3 | Most of the time                                                                    | 3 |   | Nearly all the time                                                          |
|   | 2 | A lot of the time                                                                   | 2 |   | Very often                                                                   |
|   | 1 | From time to time, occasionally                                                     | 1 |   | Sometimes                                                                    |
|   | 0 | Not at all                                                                          | 0 |   | Not at all                                                                   |
|   |   | <b>I still enjoy the things I used to enjoy:</b>                                    |   |   | <b>I get a sort of frightened feeling like 'butterflies' in the stomach:</b> |
| 0 |   | Definitely as much                                                                  |   | 0 | Not at all                                                                   |
| 1 |   | Not quite so much                                                                   |   | 1 | Occasionally                                                                 |
| 2 |   | Only a little                                                                       |   | 2 | Quite Often                                                                  |
| 3 |   | Hardly at all                                                                       |   | 3 | Very Often                                                                   |
|   |   | <b>I get a sort of frightened feeling as if something awful is about to happen:</b> |   |   | <b>I have lost interest in my appearance:</b>                                |
|   | 3 | Very definitely and quite badly                                                     | 3 |   | Definitely                                                                   |
|   | 2 | Yes, but not too badly                                                              | 2 |   | I don't take as much care as I should                                        |
|   | 1 | A little, but it doesn't worry me                                                   | 1 |   | I may not take quite as much care                                            |
|   | 0 | Not at all                                                                          | 0 |   | I take just as much care as ever                                             |
|   |   | <b>I can laugh and see the funny side of things:</b>                                |   |   | <b>I feel restless as I have to be on the move:</b>                          |
| 0 |   | As much as I always could                                                           |   | 3 | Very much indeed                                                             |
| 1 |   | Not quite so much now                                                               |   | 2 | Quite a lot                                                                  |
| 2 |   | Definitely not so much now                                                          |   | 1 | Not very much                                                                |

|   |   |                                              |   |   |                                                        |
|---|---|----------------------------------------------|---|---|--------------------------------------------------------|
| 3 |   | Not at all                                   |   | 0 | Not at all                                             |
|   |   | <b>Worrying thoughts go through my mind:</b> |   |   | <b>I look forward with enjoyment to things:</b>        |
|   | 3 | A great deal of the time                     | 0 |   | As much as I ever did                                  |
|   | 2 | A lot of the time                            | 1 |   | Rather less than I used to                             |
|   | 1 | From time to time, but not too often         | 2 |   | Definitely less than I used to                         |
|   | 0 | Only occasionally                            | 3 |   | Hardly at all                                          |
|   |   | <b>I feel cheerful:</b>                      |   |   | <b>I get sudden feelings of panic:</b>                 |
| 3 |   | Not at all                                   |   | 3 | Very often indeed                                      |
| 2 |   | Not often                                    |   | 2 | Quite often                                            |
| 1 |   | Sometimes                                    |   | 1 | Not very often                                         |
| 0 |   | Most of the time                             |   | 0 | Not at all                                             |
|   |   | <b>I can sit at ease and feel relaxed:</b>   |   |   | <b>I can enjoy a good book or radio or TV program:</b> |
|   | 0 | Definitely                                   | 0 |   | Often                                                  |
|   | 1 | Usually                                      | 1 |   | Sometimes                                              |
|   | 2 | Not Often                                    | 2 |   | Not often                                              |
|   | 3 | Not at all                                   | 3 |   | Very seldom                                            |

Please check you have answered all the questions

Scoring:

Total score: Depression (D) \_\_\_\_\_ Anxiety (A) \_\_\_\_\_

0-7 = Normal

8-10 = Borderline abnormal (borderline case)

11-21 = Abnormal (case)



Supplementary Table S5. Evaluation of health-related quality of life by using the Sleep Scale from the Medical Outcome Study (MOS-SS)

| Outcomes                                | Placebo (n=15) |             | <i>p</i> value | Red ginseng (n=15) |             | <i>p</i> value |
|-----------------------------------------|----------------|-------------|----------------|--------------------|-------------|----------------|
|                                         | Week 0         | Week 12     |                | Week 0             | Week 12     |                |
| Sleep disturbance                       | 61.1 ± 15.4    | 66.9 ± 15.9 | 0.128          | 69.1 ± 13.0        | 70.8 ± 12.4 | 0.472          |
| Daytime somnolence                      | 74.5 ± 14.8    | 77.5 ± 16/8 | 0.342          | 74.7 ± 17.1        | 83.0 ± 8.9  | 0.043          |
| Sleep adequacy                          | 43.8 ± 17.6    | 40.1 ± 20.9 | 0.503          | 44.1 ± 22.6        | 38.2 ± 24.7 | 0.345          |
| Snoring                                 | 59.4 ± 26.5    | 63.5 ± 27.3 | 0.305          | 64.7 ± 27.6        | 68.6 ± 28.2 | 0.624          |
| Awaken short of breath or with headache | 90.6 ± 21.9    | 97.9 ± 5.7  | 0.102          | 94.1 ± 11.7        | 95.1 ± 9.8  | 0.705          |
| Quality of sleep                        | 6.8 ± 1.7      | 6.8 ± 1.4   | 0.660          | 7.2 ± 1.7          | 6.9 ± 1.6   | 0.273          |
| Sleep problems index                    | 64.9 ± 9.3     | 69.2 ± 6.3  | 0.098          | 69.5 ± 5.7         | 69.2 ± 6.7  | 0.777          |

All values were shown by mean with standard deviation

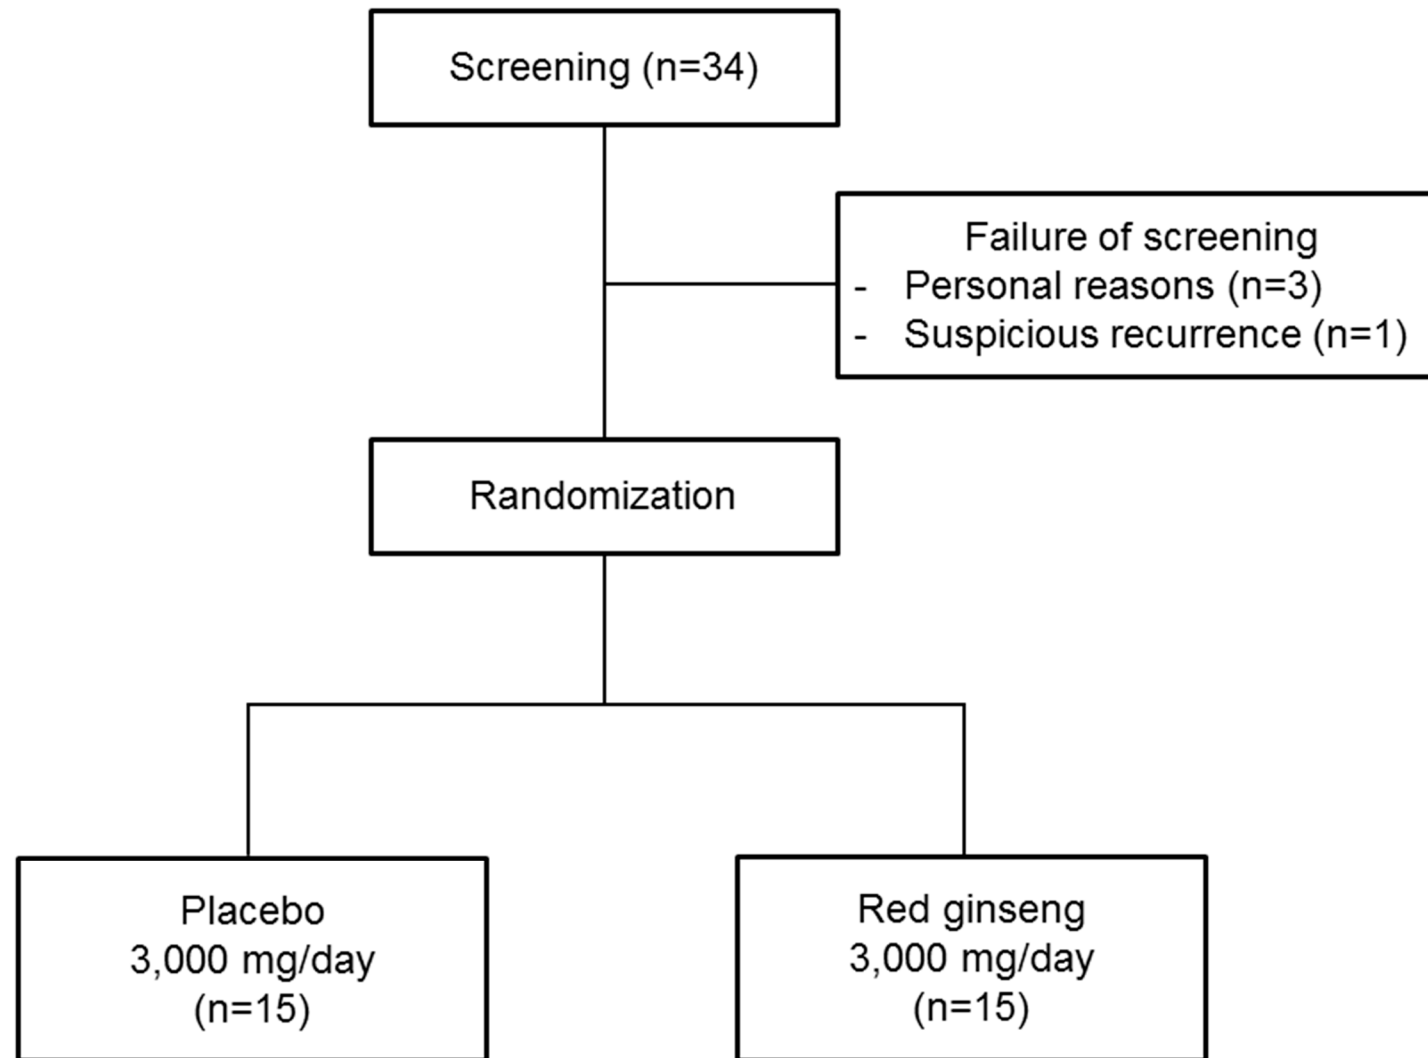

Figure S1. Flow chart of the study design and subject participation.
